# Supplementary figures and images for: Activity-dependent mitochondrial ROS signaling regulates recruitment of glutamate receptors to synapses
Source: eLife journal article supplement (doi:10.7554/elife.92376), 2024-03-14

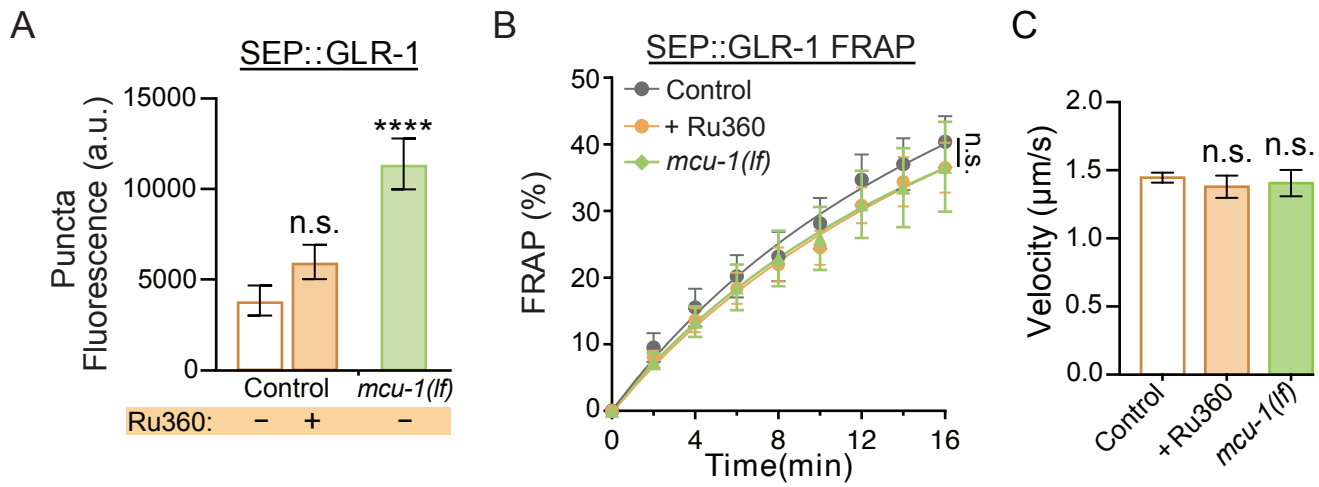

Supplement: supp [file elife-92376-supp-v1.zip]

A

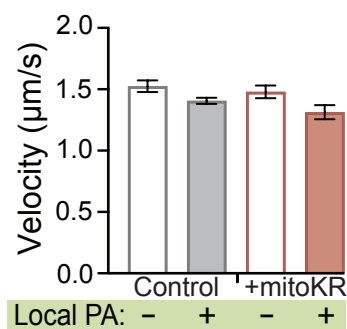

B

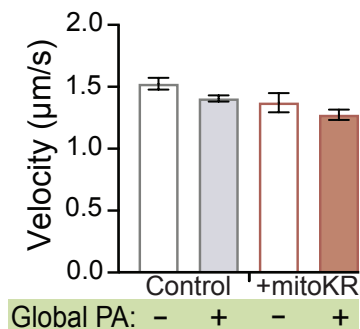

C

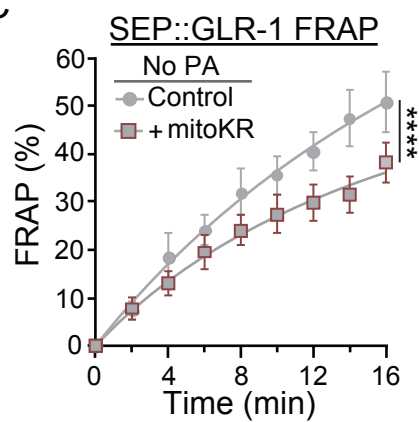

D

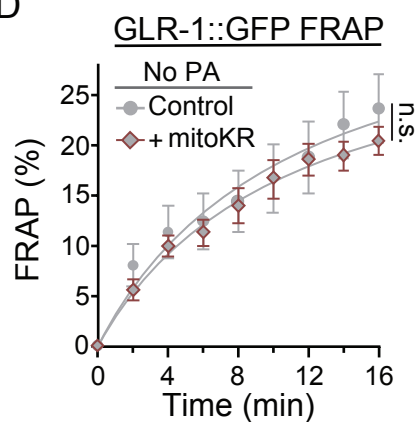

Supplement: supp [file elife-92376-supp-v1.zip]

A

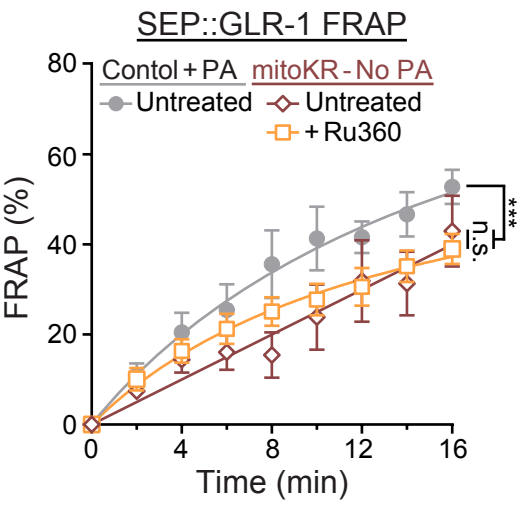

B

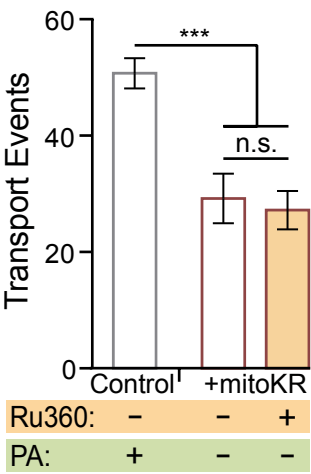

Supplement: supp [file elife-92376-supp-v1.zip]

A

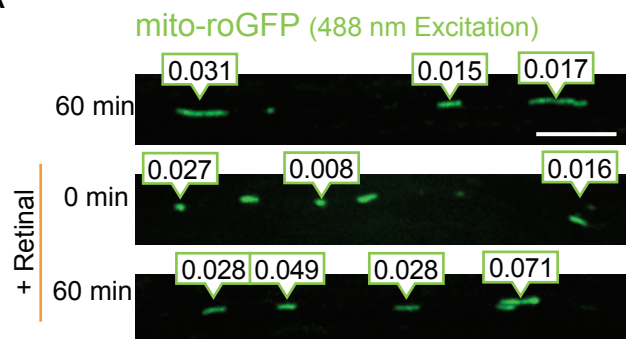

B

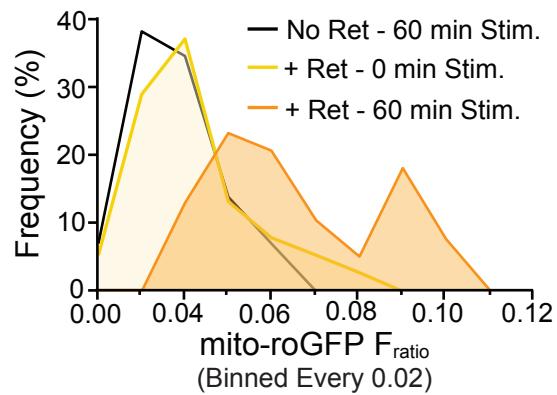

C

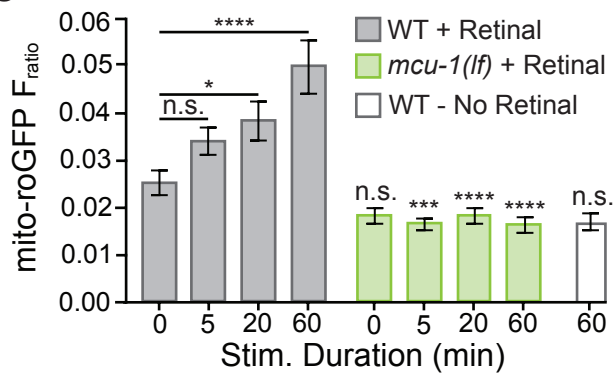

D

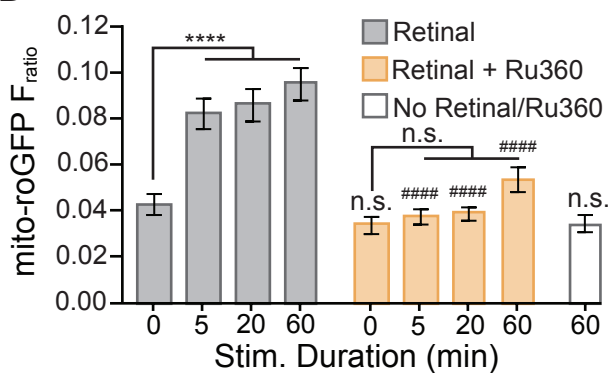

Supplement: supp [file elife-92376-supp-v1.zip]
